# Supplementary figures and images for: 3D-printed self-sensing magnetically actuated microfluidic chip for closed-loop drug delivery
Source: Royal Society of Chemistry journal article supplement (doi:10.1039/d5lc01006c), 2026-01-01

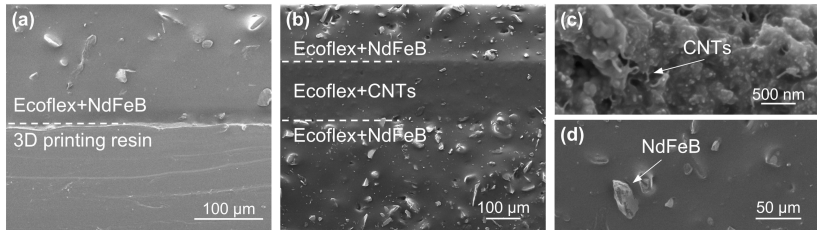

Supplement: d5lc01006c10.pdf [file d5lc01006c10.pdf]

(a)

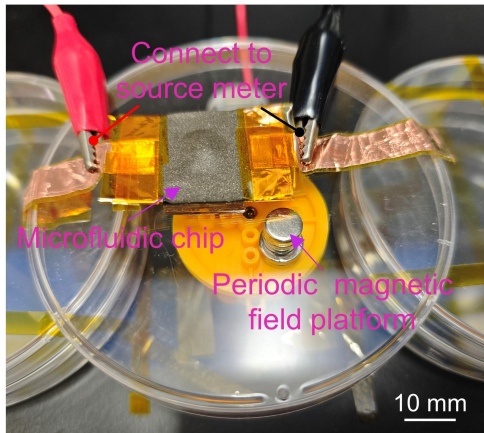

(b)

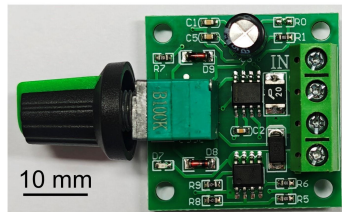

(c)

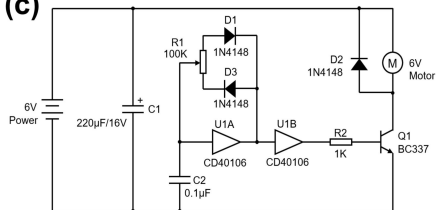

Supplement: d5lc01006c11.pdf [file d5lc01006c11.pdf]

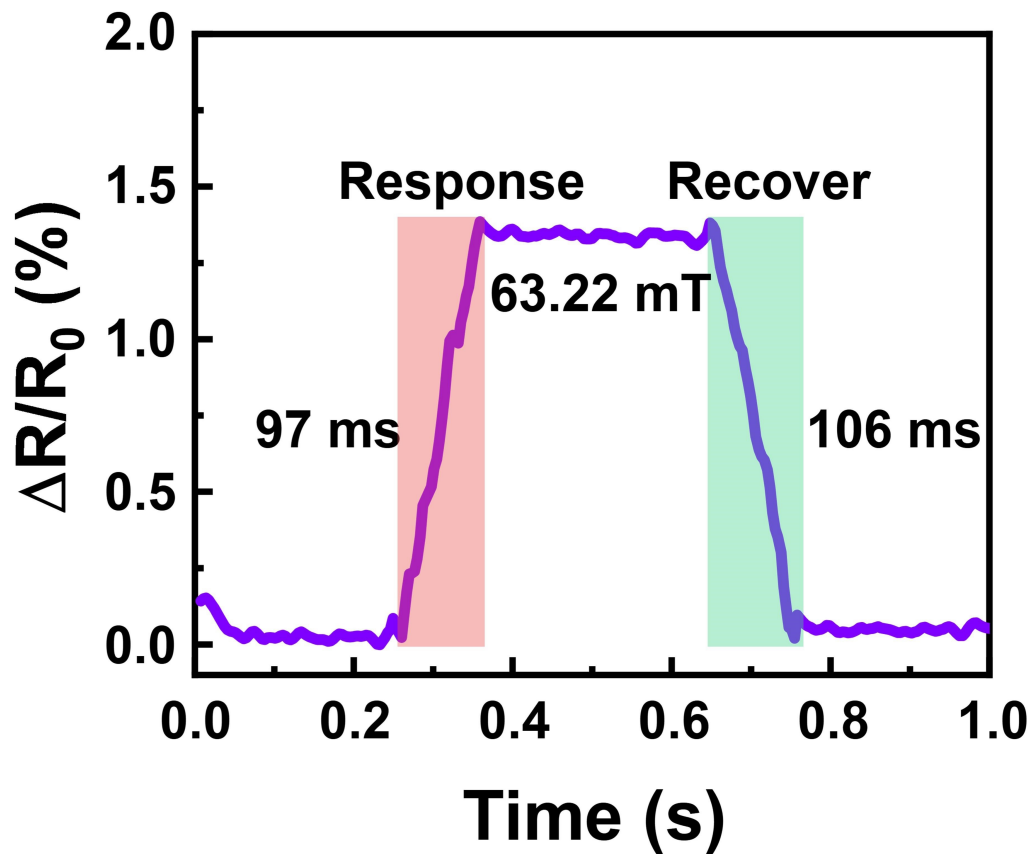

Supplement: d5lc01006c12.pdf [file d5lc01006c12.pdf]

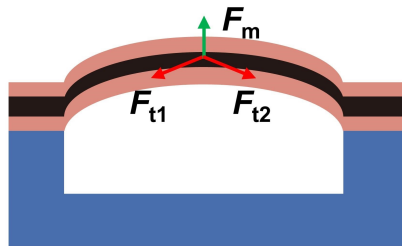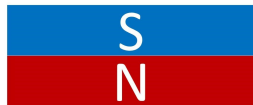

$F_t$ : Stress     $F_m$ : Magnetic force

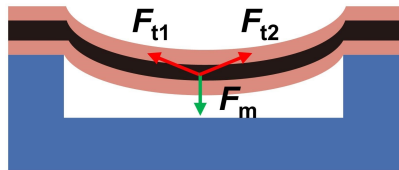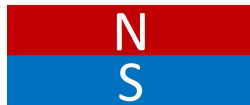

Supplement: d5lc01006c13.pdf [file d5lc01006c13.pdf]

$F_t$ : Stress    $v$ : Magnet movement speed

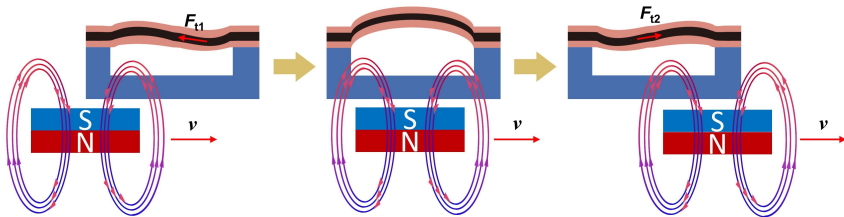

Supplement: d5lc01006c15.pdf [file d5lc01006c15.pdf]

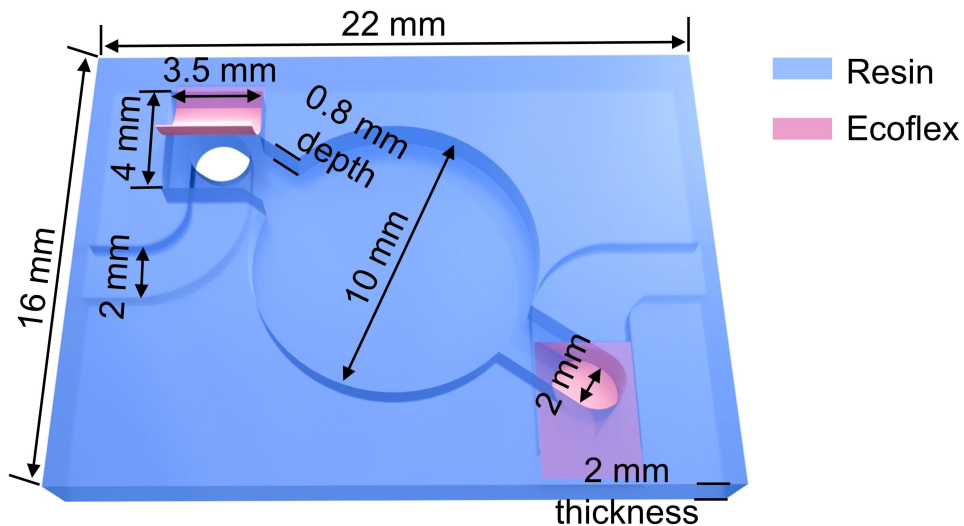

Supplement: d5lc01006c2.pdf [file d5lc01006c2.pdf]

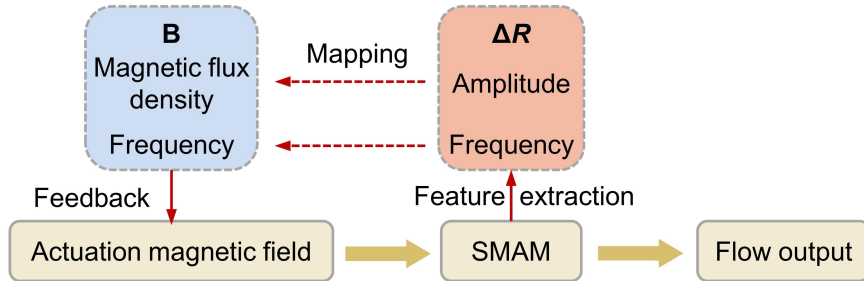

Supplement: d5lc01006c4.pdf [file d5lc01006c4.pdf]

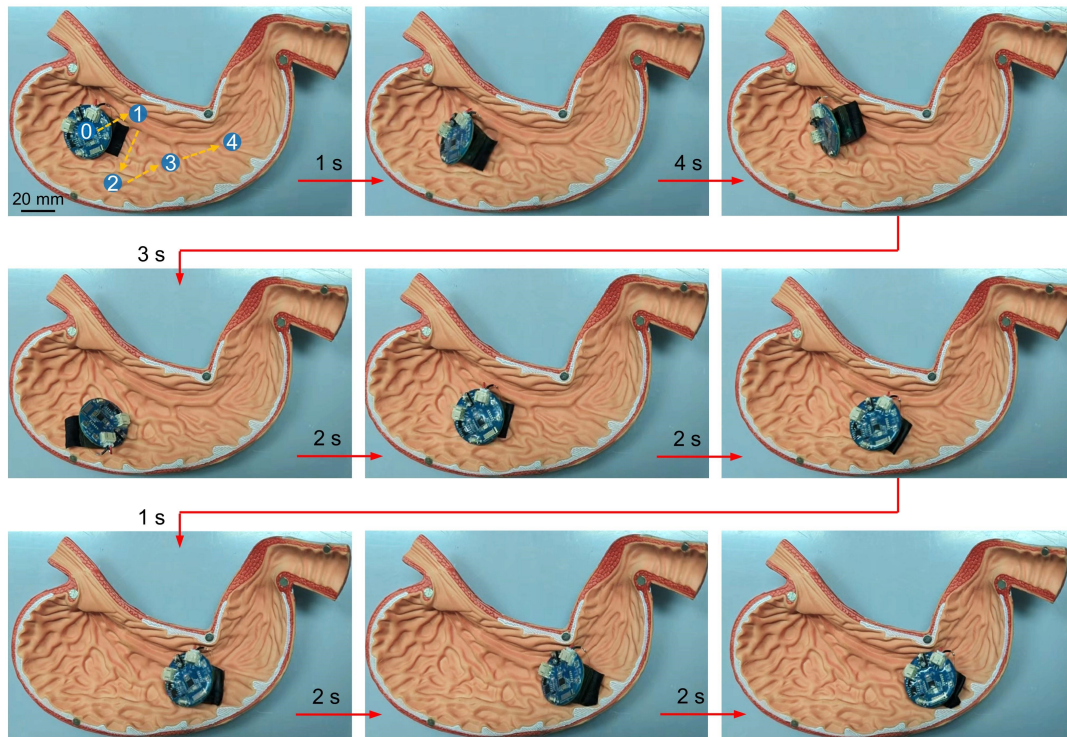

Supplement: d5lc01006c8.pdf [file d5lc01006c8.pdf]
